# Supplementary material for: Immune Dysregulation in Acute SARS-CoV-2 Infection
Source: PubMed Central journal article supplement (PMC9973727; doi:10.20411/pai.v7i2.537), 2023-02-20
Supplement: pai-7-143-s01.pdf [file pai-7-143-s01.pdf]

**SUPPLEMENTAL TABLE 1 - CYTOKINE ARRAY CONTENT**

| <b>Bead ID</b> | <b>Antigen</b>                          | <b>Vendor</b>   | <b>Catalog #</b> |
|----------------|-----------------------------------------|-----------------|------------------|
| 1              | Bare Bead                               |                 |                  |
| 2              | Human IgG from serum                    | Sigma           | I4506            |
| 3              | Anti-Human IgG Fc fragment specific     | Jackson         | 109-005-008      |
| 4              | Anti-Human IgG (H+L)                    | Jackson         | 109-005-003      |
| 5              | Anti-Human IgG F(ab') fragment specific | Jackson         | 109-005-006      |
| 6              | CD74                                    | Prospec         | PRO-1467         |
| 7              | IFN $\lambda$ 2                         | Peprotech       | 300-02K          |
| 10             | IL-1 $\alpha$                           | Prospec         | CYT-253          |
| 13             | IFN $\alpha$ 1                          | Prospec         | CYT-291          |
| 14             | IFN $\alpha$ 7                          | Prospec         | CYT-196          |
| 16             | IFN $\alpha$ 10                         | Sino Biological | 10349-H08H       |
| 18             | IFN $\alpha$ 8                          | Sino Biological | 10347-H08H       |
| 19             | IFN $\alpha$ 6                          | Origene         | TP760329         |
| 20             | IL-2                                    | Peprotech       | 200-02           |
| 21             | IL-4                                    | Peprotech       | 200-04           |
| 22             | IL-13                                   | Peprotech       | 200-13           |
| 23             | IL-21                                   | Peprotech       | 200-21           |
| 24             | Fractalkine/CX3CL1                      | Peprotech       | 300-31           |
| 25             | IP-10/CXCL10                            | Peprotech       | 300-12           |
| 26             | IL-31                                   | Prospec         | CYT-625          |
| 27             | IL-6                                    | Prospec         | CYT-098          |
| 28             | MCP-2/CCL8                              | Peprotech       | 300-15           |
| 29             | OSM                                     | Peprotech       | 300-10           |
| 30             | IL-11                                   | Prospec         | CYT-214          |
| 31             | SDF-1a/CXCL12                           | Peprotech       | 300-28A          |
| 32             | IL-27                                   | Prospec         | CYT-048          |
| 33             | CNTF                                    | Prospec         | CYT-272          |
| 34             | CT-2                                    | Prospec         | PRO-1578         |
| 38             | GM-CSF                                  | Peprotech       | 300-03           |
| 39             | IFN $\alpha$ 2                          | R&D             | 11101-2          |
| 40             | IFN $\beta$                             | Peprotech       | 300-02BC         |

|    |                 |                 |                |
|----|-----------------|-----------------|----------------|
| 41 | IFN $\gamma$    | Peprotech       | 300-02         |
| 42 | IFN $\epsilon$  | R&D             | 9667-ME-025/CF |
| 43 | IFN $\lambda$ 1 | Peprotech       | 300-02L        |
| 44 | IFN $\lambda$ 3 | R&D             | 5259-IL-025/CF |
| 45 | IFN $\omega$    | R&D             | 11395-1        |
| 46 | IL-10           | Peprotech       | 200-10         |
| 47 | IL-12p40        | Peprotech       | 200-12P40      |
| 48 | IL-12p70        | Peprotech       | 200-12         |
| 49 | IL-15           | Peprotech       | 200-15         |
| 50 | IL-17F          | Peprotech       | 200-25         |
| 51 | IL-1 $\beta$    | Peprotech       | 200-01B        |
| 52 | IL-22           | Peprotech       | 200-22         |
| 55 | TNF $\alpha$    | Peprotech       | 300-01A        |
| 56 | TNF $\beta$     | Peprotech       | 300-01B        |
| 58 | ACE2            | Sino Biological | 10108-H05H     |
| 59 | Eotaxin         | Peprotech       | 300-21         |
| 60 | Eotaxin 2       | Peprotech       | 300-33         |
| 62 | IL-17A          | Peprotech       | 200-17         |
| 63 | IL-33           | Peprotech       | 200-33         |
| 64 | IL-7            | Peprotech       | 200-07         |
| 65 | MIP-1 $\alpha$  | Peprotech       | 300-08         |
| 67 | PDGFBB          | Peprotech       | 100-14B        |
| 68 | sRANK-ligand    | Peprotech       | 310-01C        |
| 69 | TIF1 $\gamma$   | Surmodics       | A11001         |
| 70 | CRP             | Prospec         | PRO-335        |
| 71 | MPO             | Prospec         | ENZ-074        |
| 73 | C3a             | R&D             | 3677-C3-025    |
| 76 | Gal-9           | R&D             | 9064-GA-050    |
| 77 | LIF             | Peprotech       | 300-05         |
| 78 | VEGFB           | Peprotech       | 100-20B        |
| 79 | HTRA1           | R&D             | 2916-SE-020    |
| 80 | d-dimer         | LeeBio          | 200-13-0.1     |
